# Supplementary material for: Spatio-temporal ecology of sympatric felids on Borneo. Evidence for resource partitioning?
Source: PubMed Central journal article supplement (PMC6054408; doi:10.1371/journal.pone.0200828), 2018-07-20

# Spatio-temporal ecology of sympatric felids on Borneo. Evidence for resource partitioning?

**S1 Fig.** Scaling plots of AICc values and coefficient values for relationships between Bornean felid species' occurrence and a range of predictor habitat variables cover type across 7 spatial scales. Spatial scales with the lowest AICc were deemed to be optimal, and used for further analysis.

(a) Sunda clouded leopard

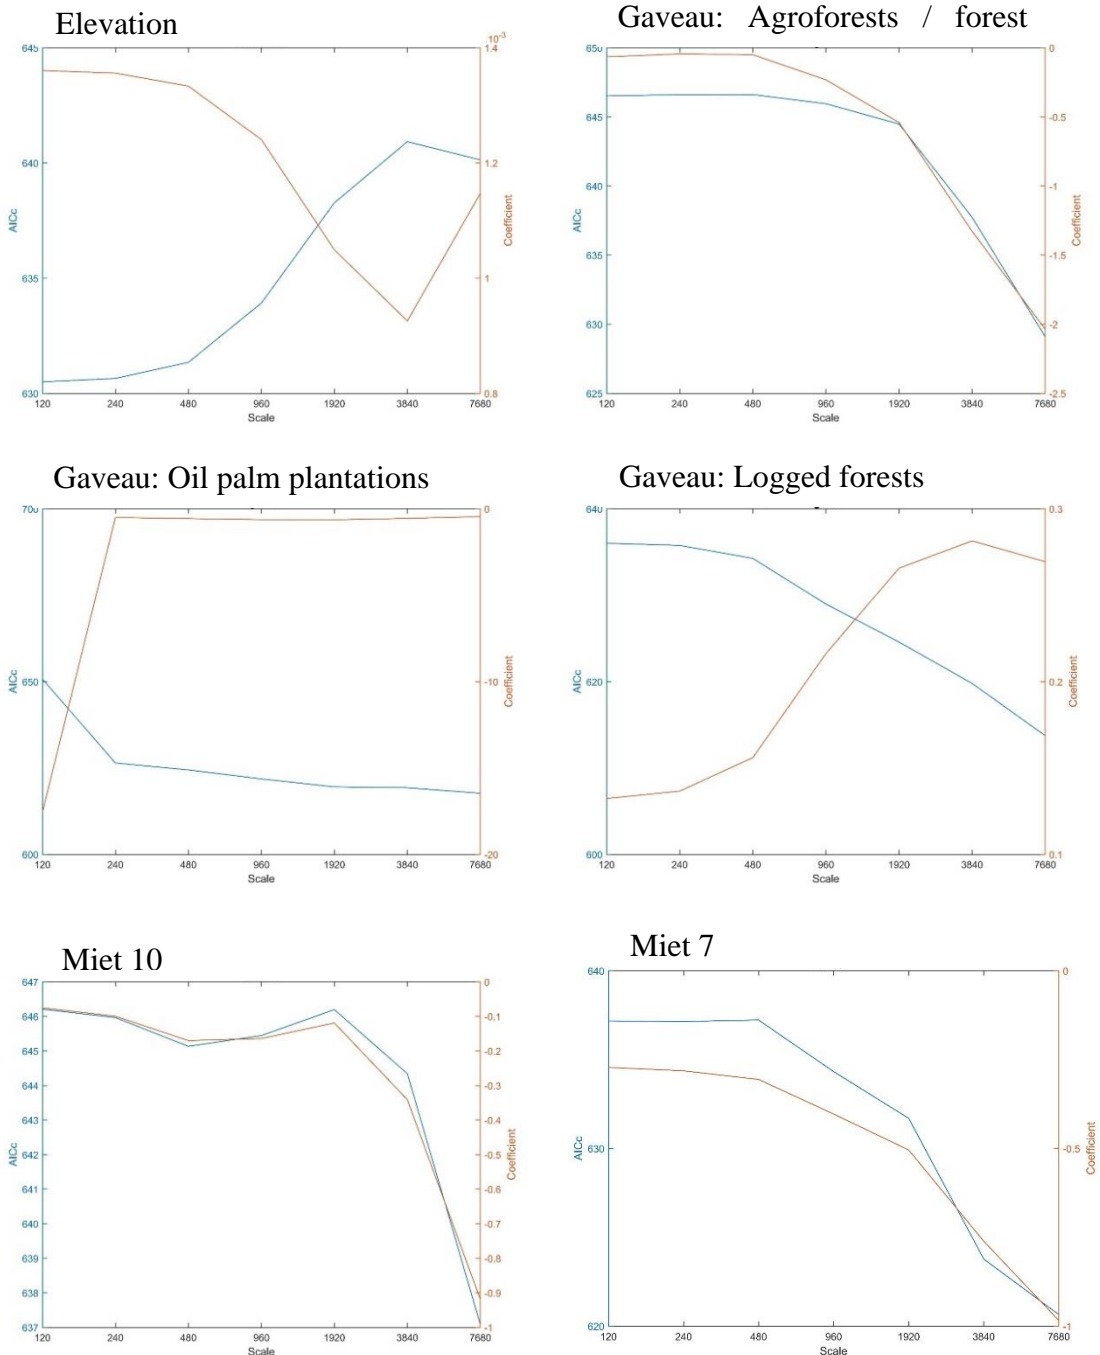

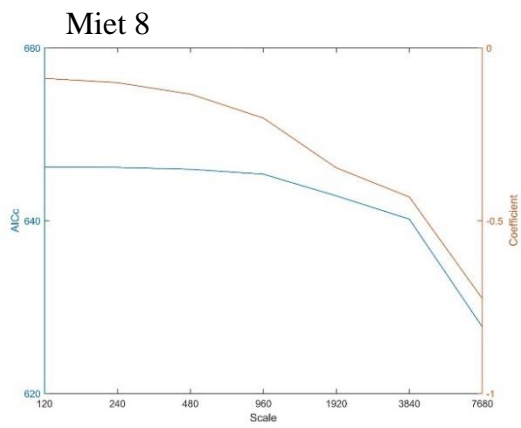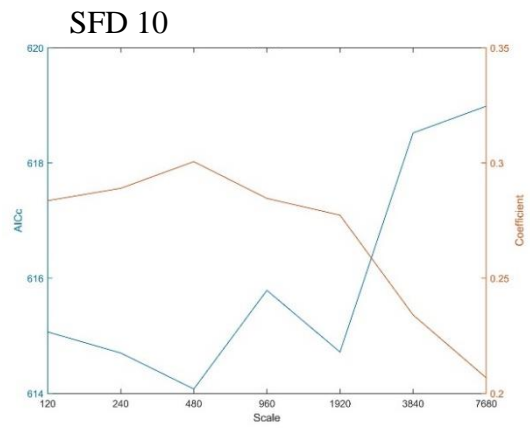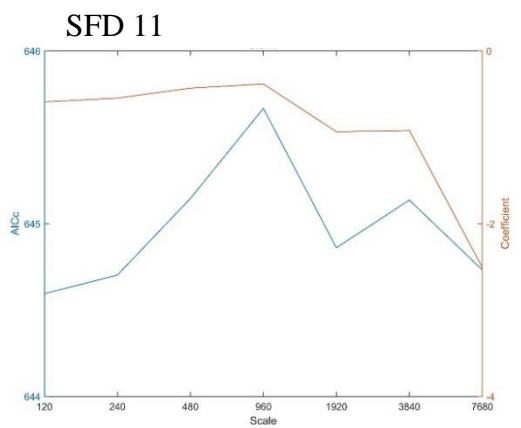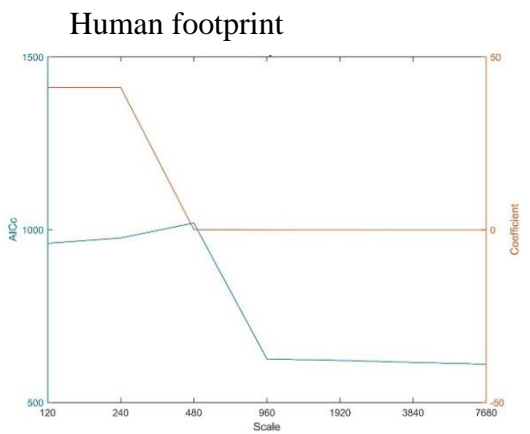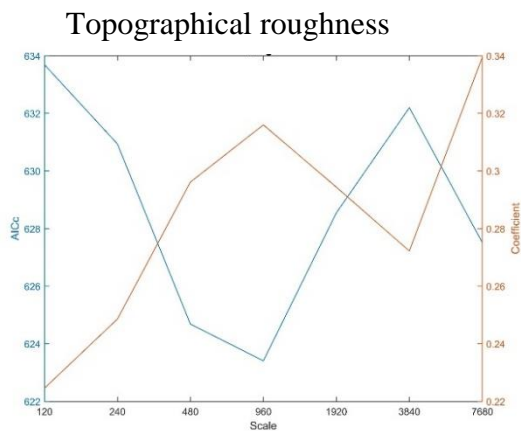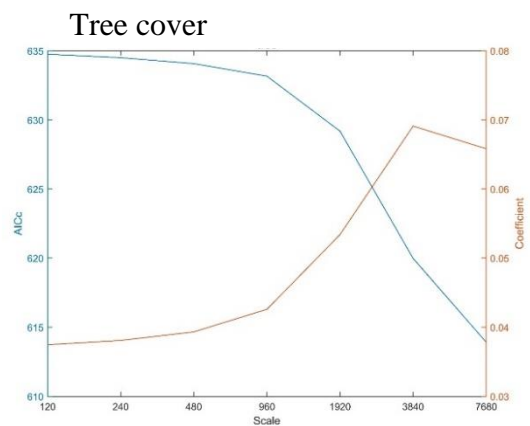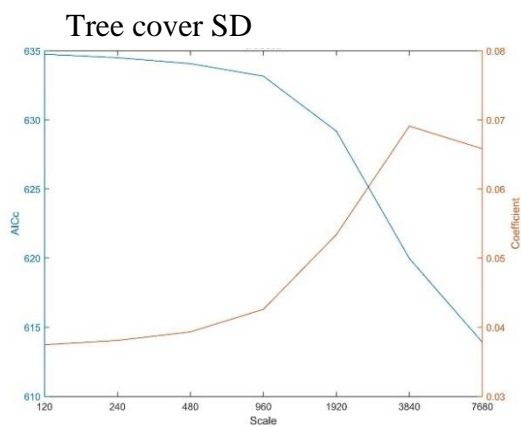

(b) Bay cat

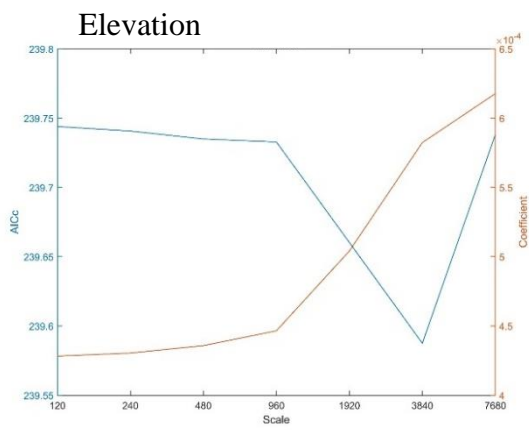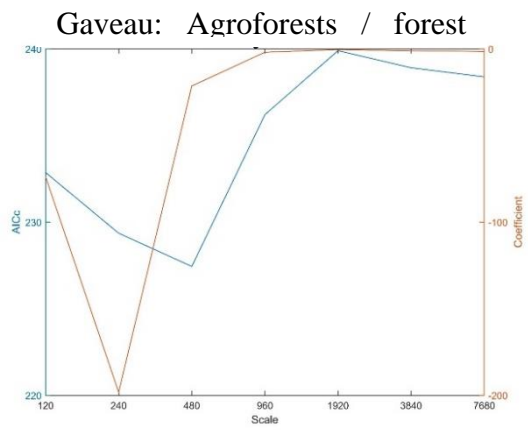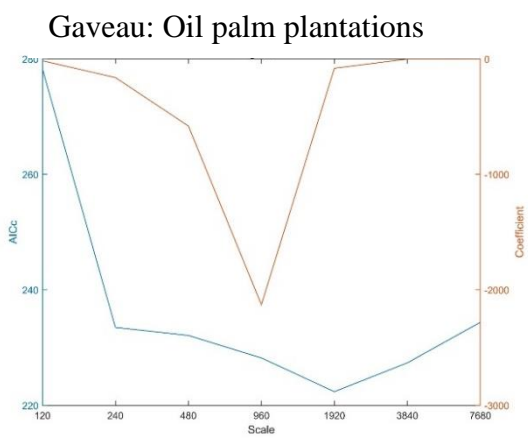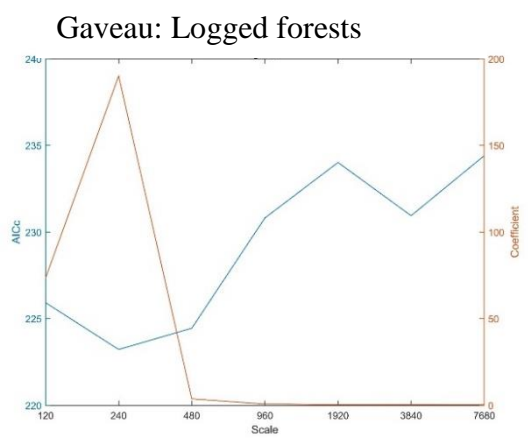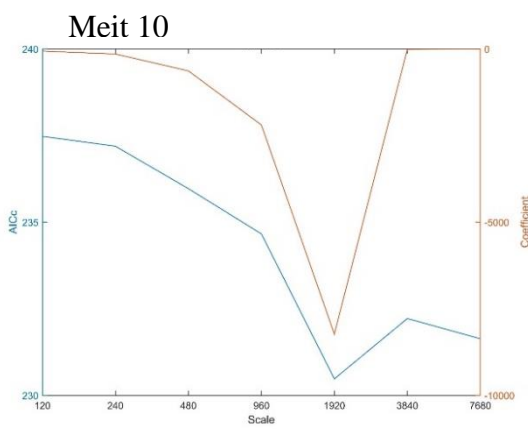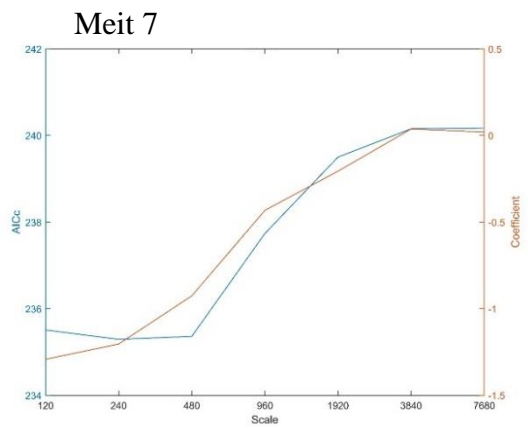

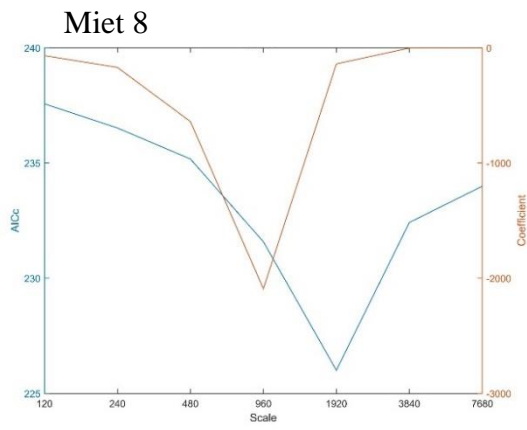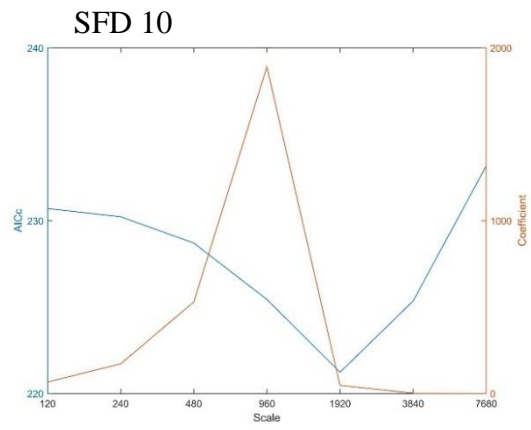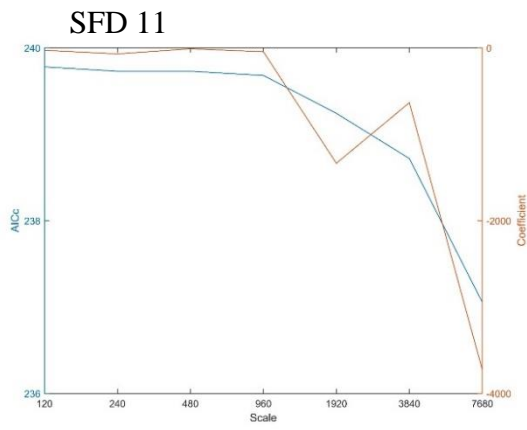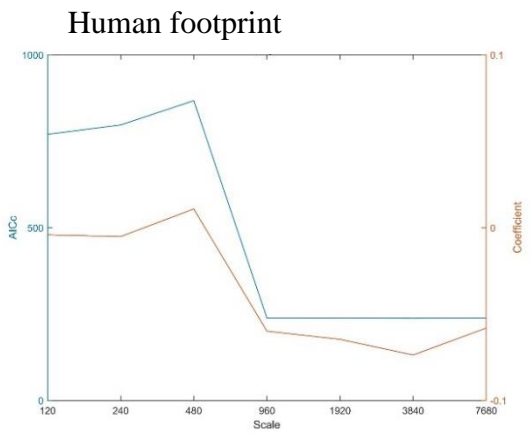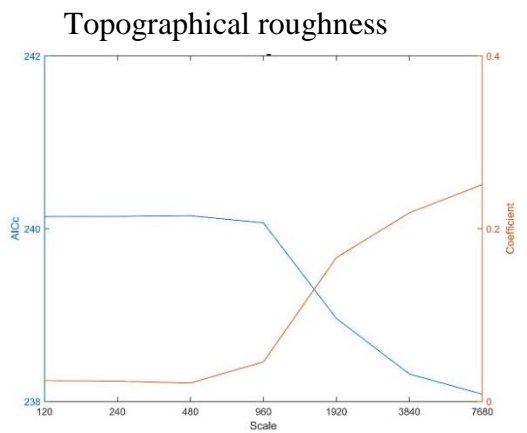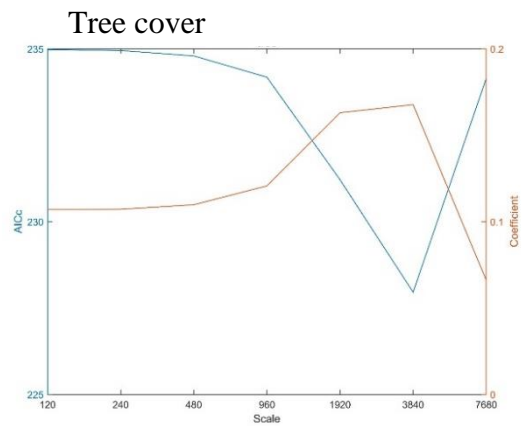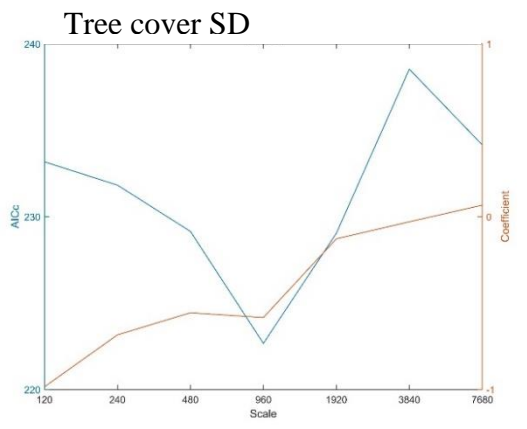

(c) Marbled cat

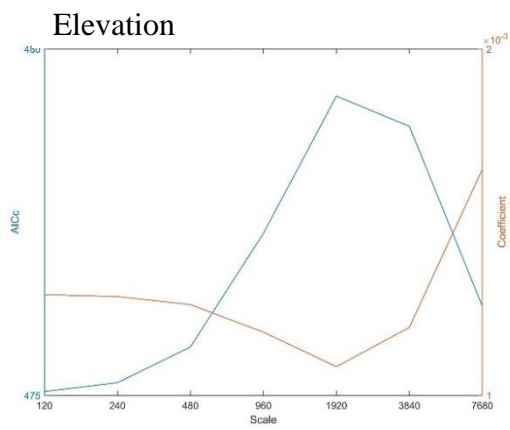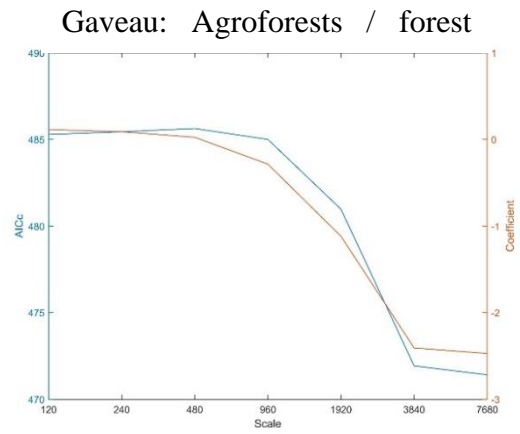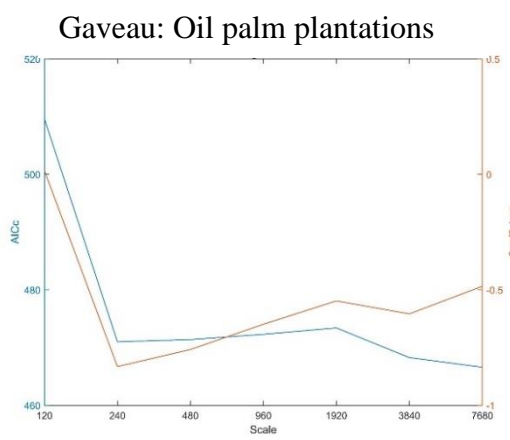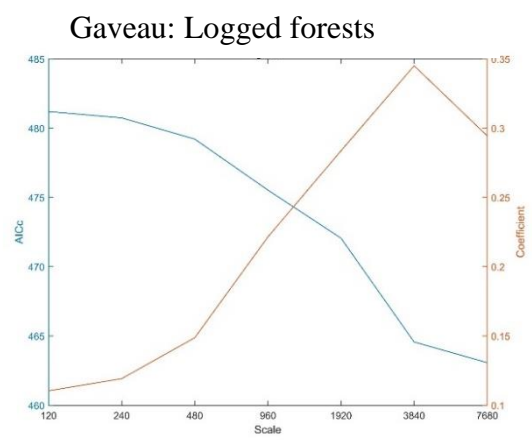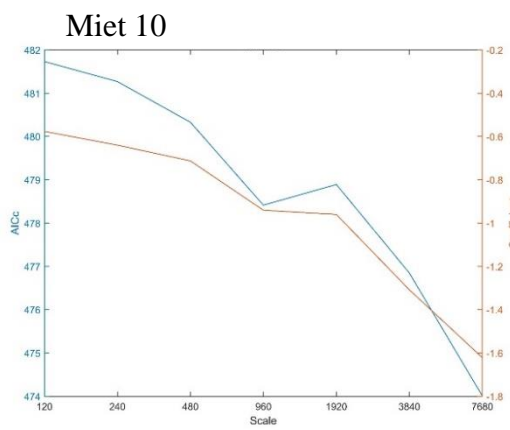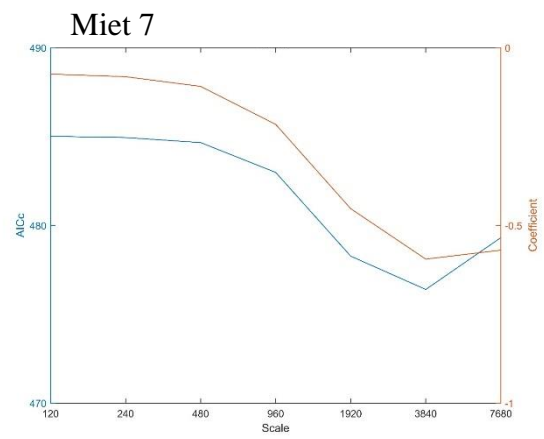

Miet 8

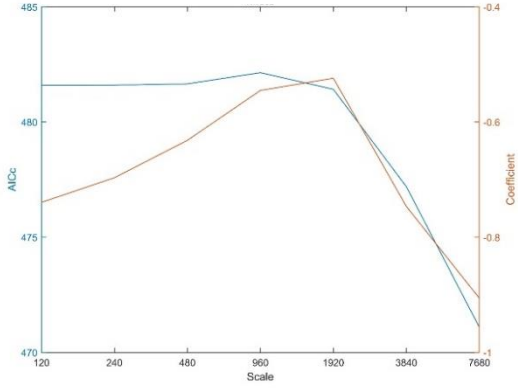

SFD 10

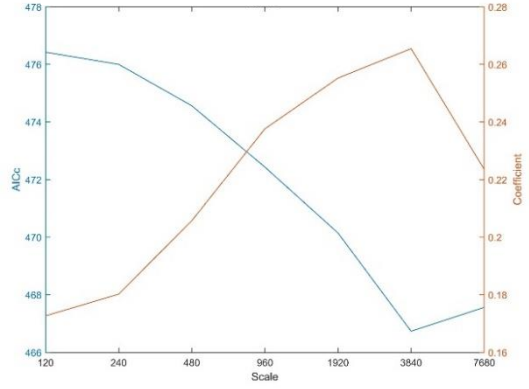

SFD 11

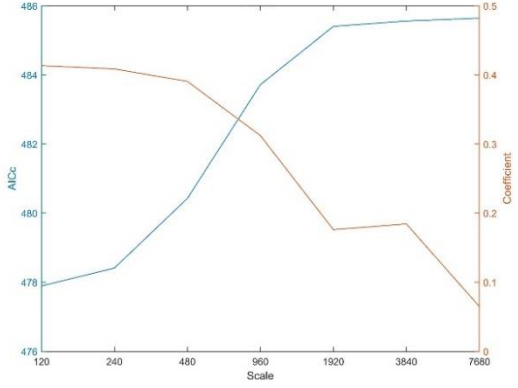

Human footprint

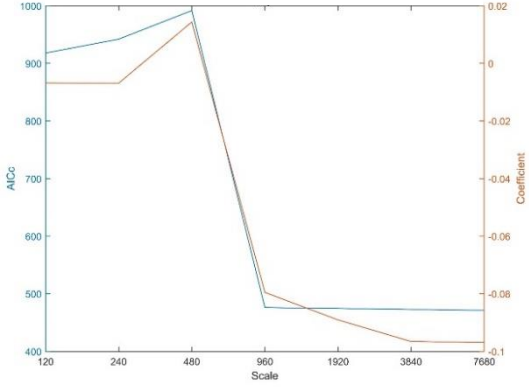

Topographical roughness

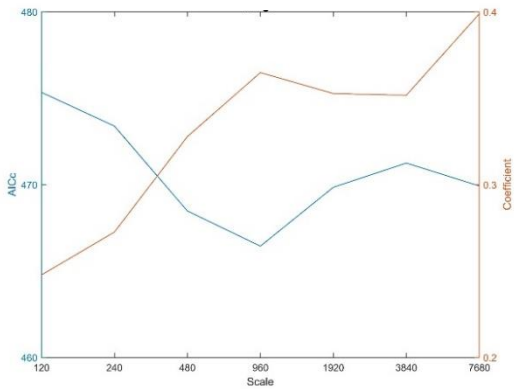

Tree cover

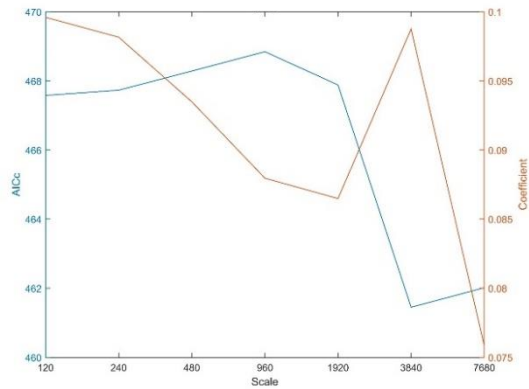

Tree cover SD

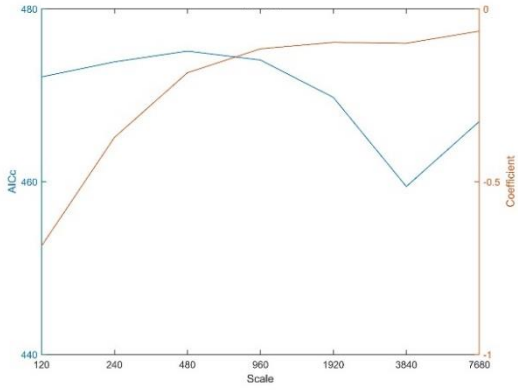

(d) Leopard cat

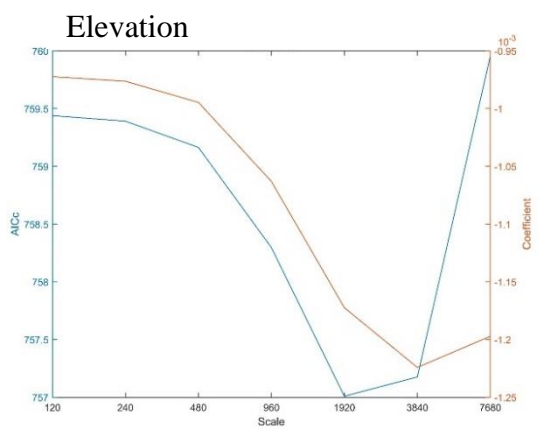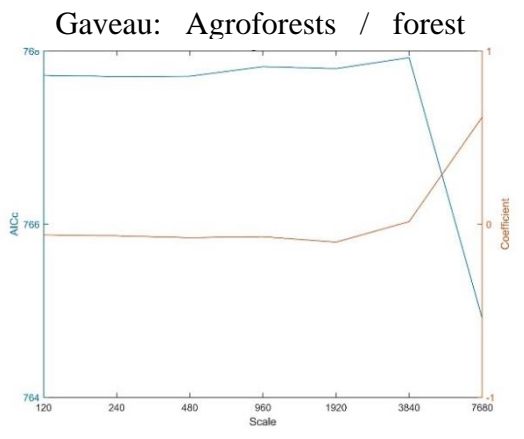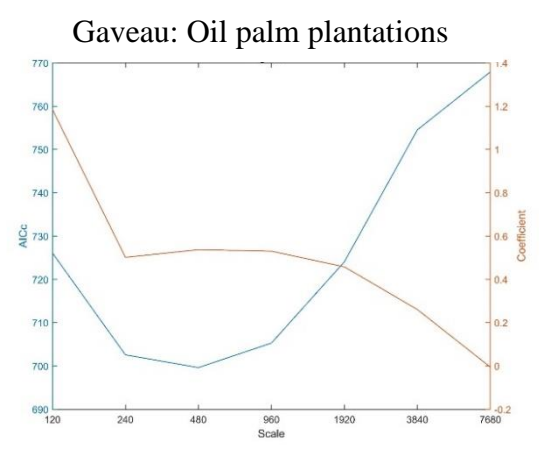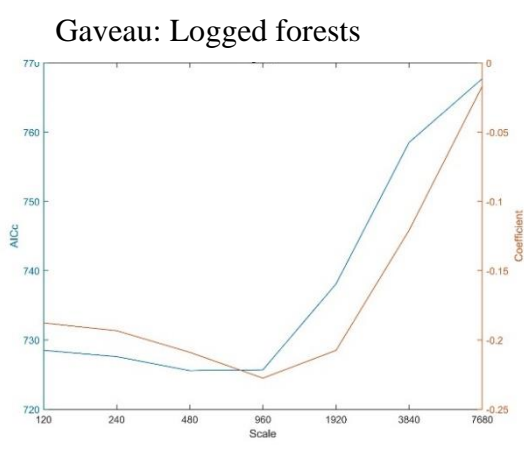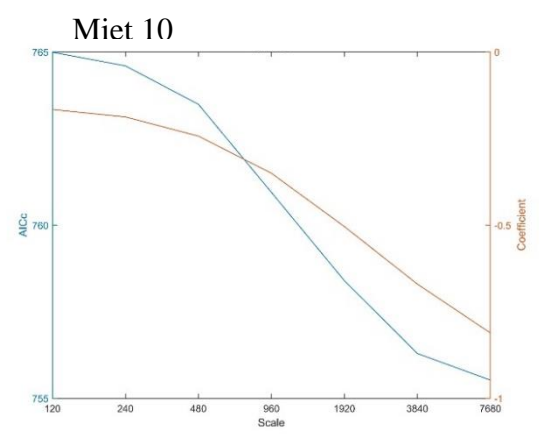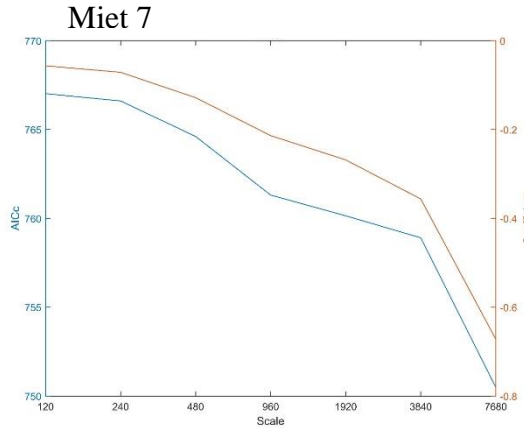

Miet 8

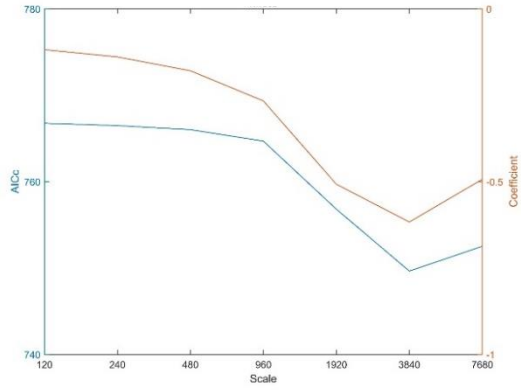

SFD 10

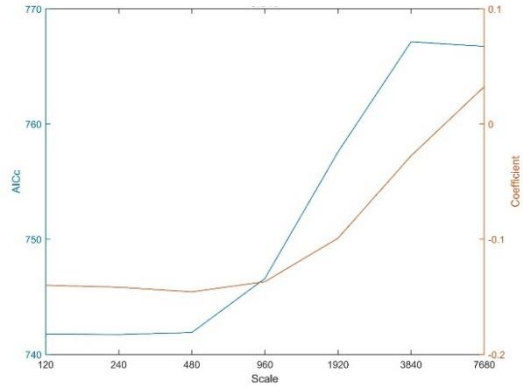

SFD 11

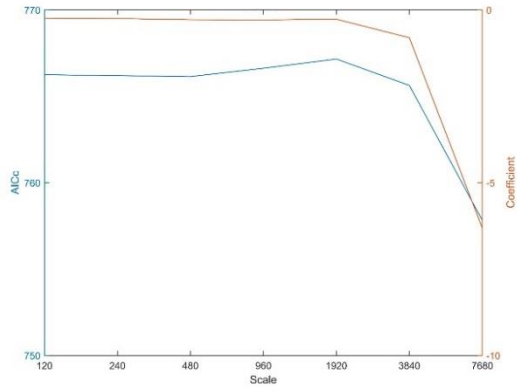

Human footprint

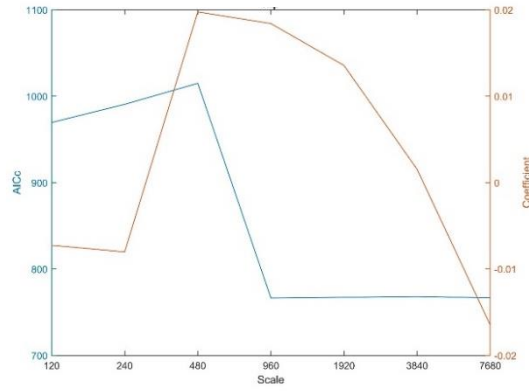

Topographical roughness

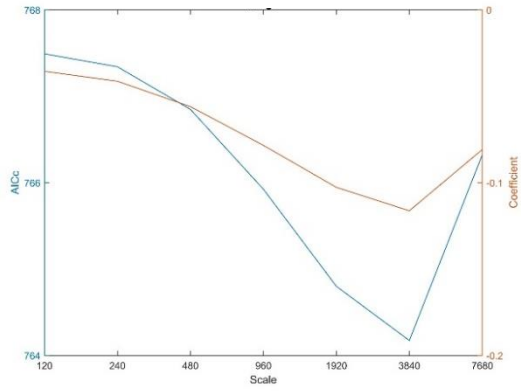

Tree cover

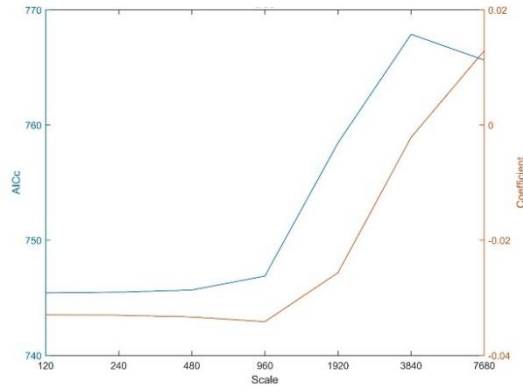

Tree cover SD

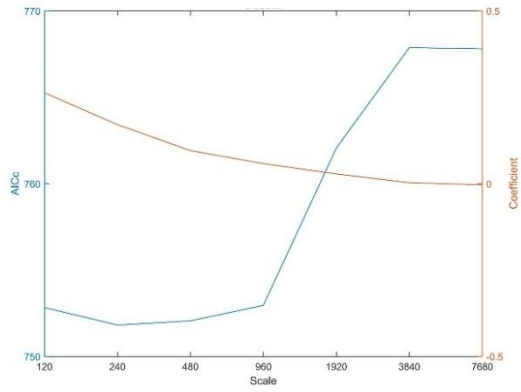

Supplement: pone.0200828.s001.pdf [file pone.0200828.s001.pdf]
