# Supplementary material for: Spatio-temporal ecology of sympatric felids on Borneo. Evidence for resource partitioning?
Source: PubMed Central journal article supplement (PMC6054408; doi:10.1371/journal.pone.0200828), 2018-07-20
Supplement: pone.0200828.s002.pdf [file pone.0200828.s002.pdf]

## Spatio-temporal ecology of sympatric felids on Borneo. Evidence for resource partitioning?

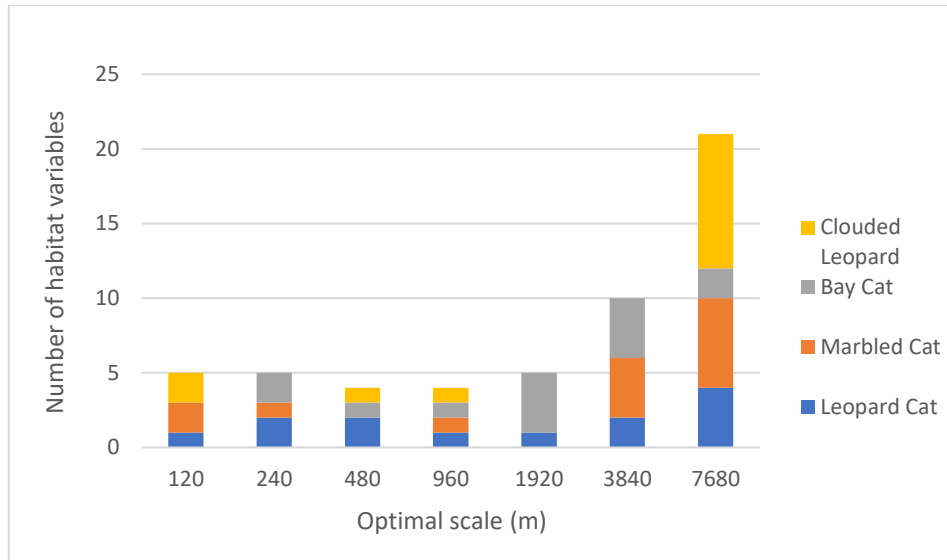

**S2 Fig.** Bar chart showing the optimal scaling of habitat variables in Bornean felids.
