# Supplementary material for: Spatio-temporal ecology of sympatric felids on Borneo. Evidence for resource partitioning?
Source: PubMed Central journal article supplement (PMC6054408; doi:10.1371/journal.pone.0200828), 2018-07-20
Supplement: pone.0200828.s003.pdf [file pone.0200828.s003.pdf]

# Spatio-temporal ecology of sympatric felids on Borneo. Evidence for resource partitioning?

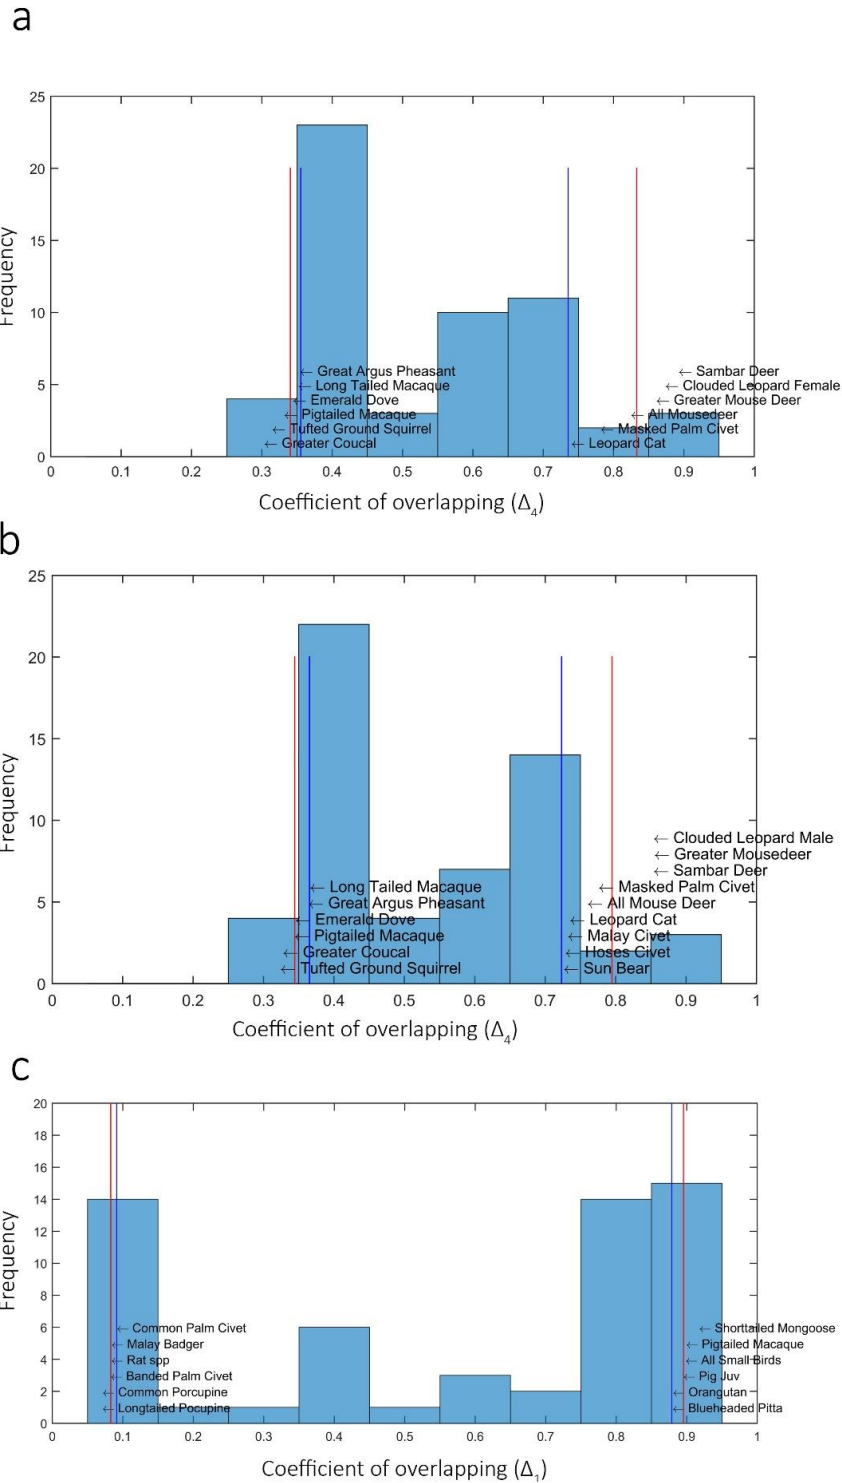

**S3 Fig.** Histogram of the frequency of coefficient of temporal overlap ( $\Delta_1$  and  $\Delta_4$ ) values between Bornean felids and all other species and species groups ( $n = 58$ ). a. Sunda clouded leopard males; b. Sunda clouded leopard females; c. bay cat. The 5<sup>th</sup> and 95<sup>th</sup> percentiles of the  $\Delta_1$  and  $\Delta_4$  distribution for each felid are shown in vertical red lines, and the 10<sup>th</sup> and 90<sup>th</sup> percentiles are shown in vertical blue lines.

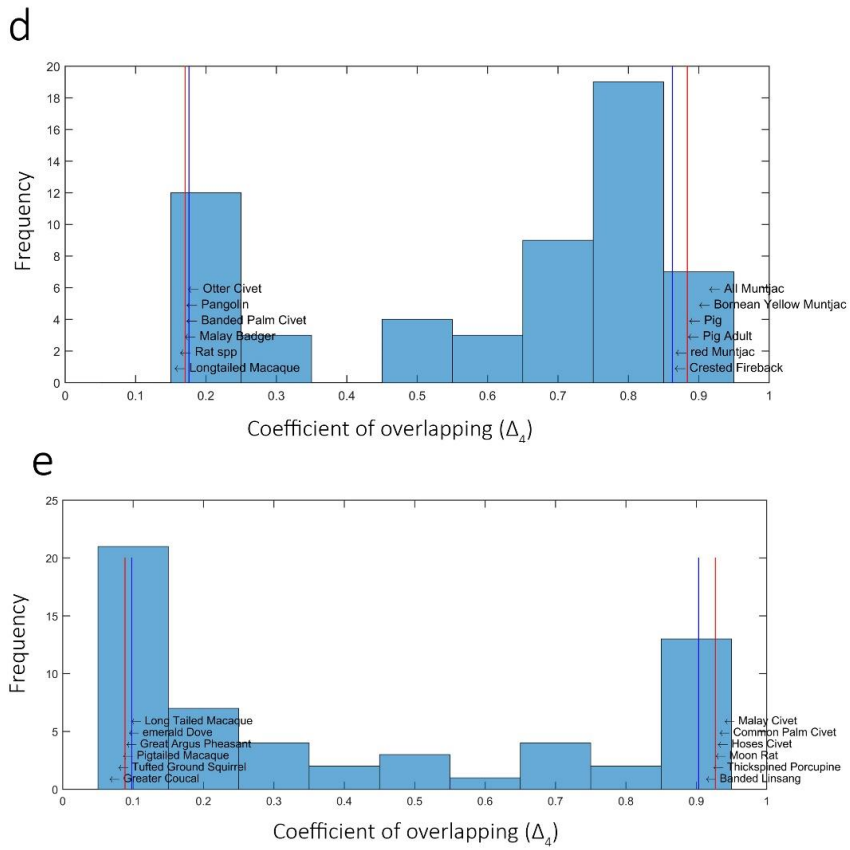

**S3 Fig continued.** Histogram of the frequency of coefficient of temporal overlap ( $\Delta_1$  and  $\Delta_4$ ) values between Bornean felids and all other species and species groups ( $n=58$ ). d. marbled cat; e. leopard cat. The 5<sup>th</sup> and 95<sup>th</sup> percentiles of the  $\Delta_1$  and  $\Delta_4$  distribution for each felid are shown in vertical red lines, and the 10<sup>th</sup> and 90<sup>th</sup> percentiles are shown in vertical blue lines.
