# Supplementary material for: Spatio-temporal ecology of sympatric felids on Borneo. Evidence for resource partitioning?
Source: PubMed Central journal article supplement (PMC6054408; doi:10.1371/journal.pone.0200828), 2018-07-20
Supplement: pone.0200828.s004.pdf [file pone.0200828.s004.pdf]

# Spatio-temporal ecology of sympatric felids on Borneo. Evidence for resource partitioning?

Andrew J. Hearn, Samuel A. Cushman, Joanna Ross, Benoit Goossens, Luke T.B. Hunter, and David W. Macdonald

**S1 Table.** Details of the eight forest and two oil palm plantation study areas in Sabah, Malaysian Borneo. <sup>a</sup> Dominant land cover classes in each study area, derived from Gaveau et al. (2014), arranged in decreasing order of occurrence.

| Study area     | Lat/Lon              | General description                                                                                                                                 | Gaveau et al. (2014) landcover classes <sup>a</sup>                                     |
|----------------|----------------------|-----------------------------------------------------------------------------------------------------------------------------------------------------|-----------------------------------------------------------------------------------------|
| Crocker Range  | 5° 26' N, 116° 02' E | Primary, hill dipterocarp, sub-montane & montane.                                                                                                   | Natural forest; Logged forest.                                                          |
| Danum Valley   | 4° 58' N, 117° 46' E | Primary, lowland & hill dipterocarp.                                                                                                                | Natural forest; Logged forest.                                                          |
| Kabili-Sepilok | 5° 51' N, 117° 57' E | Partially selectively logged, lowland Dipterocarp, heath forest & mangrove.                                                                         | Natural forest; Logged forest; Intact mangrove; Non forest; Agroforest/Forest regrowth. |
| Kinabatangan   | 5° 29' N, 118° 08' E | Selectively logged, mosaic of forest types, including riparian forest, seasonally flooded forest, swamp forest, limestone forest.                   | Logged forest; Agroforest/Forest regrowth; Non forest                                   |
| Malua          | 5° 08' N, 117° 40' E | Twice-logged (1960s & 2006-2007), lowland dipterocarp. High density of open logging roads and skid trails.                                          | Logged forest; Agroforest/Forest regrowth.                                              |
| Tabin          | 5° 14' N, 118° 51' E | Selectively logged (1969-1989), lowland dipterocarp. Low density of open and semi-closed logging roads.                                             | Logged forest; Severely degraded forest.                                                |
| Tawau          | 4° 27' N, 117° 57' E | Primary, lowland & hill dipterocarp, sub-montane & montane.                                                                                         | Natural forest, Logged forest; Agroforest/Forest regrowth                               |
| Ulu Segama     | 4° 59' N, 117° 52' E | Selectively logged (1978-1991), lowland Dipterocarp. Medium density of open and semi-closed logging roads.                                          | Logged forest; Severely degraded forest.                                                |
| Danum Palm     | 5° 05' N, 117° 46' E | Semi-mature (planted in 2000), terraced oil palm plantation. Largely open understorey. Semi-natural scrub bordering one large river and one stream. | Oil palm plantations.                                                                   |
| Minat Teguh    | 5° 50' N, 117° 53' E | Mature (planted in 1995) oil palm plantation. Largely open understorey. Border fringed with mangrove.                                               | Oil palm plantations; Intact mangroves; Natural forest, Non forest.                     |
