# Supplementary material for: Spatio-temporal ecology of sympatric felids on Borneo. Evidence for resource partitioning?
Source: PubMed Central journal article supplement (PMC6054408; doi:10.1371/journal.pone.0200828), 2018-07-20
Supplement: pone.0200828.s005.pdf [file pone.0200828.s005.pdf]

# Spatio-temporal ecology of sympatric felids on Borneo. Evidence for resource partitioning?

Andrew J. Hearn, Samuel A. Cushman, Joanna Ross, Benoit Goossens, Luke T.B. Hunter, and David W. Macdonald

**S2 Table.** Details of camera trap survey protocols for surveys of eight forest areas and two palm oil plantations in Sabah, Malaysian Borneo. <sup>a</sup> Camera trap grid area is defined by a 100% Minimum Convex Polygon around all camera stations. <sup>b</sup> We followed two survey protocols, Split-grid: where the entire grid was sequentially surveyed in two halves, and Simultaneously (Sim): where all camera stations were deployed in a single phase. <sup>c</sup> values within parentheses represent the number of camera stations situated along forest roads and trails, respectively.

| Study area       | Camera trap grid                     |                       |                                |                                    | Survey effort       |               |
|------------------|--------------------------------------|-----------------------|--------------------------------|------------------------------------|---------------------|---------------|
|                  | Area (km <sup>2</sup> ) <sup>a</sup> | Protocol <sup>b</sup> | No. cam. stations <sup>c</sup> | Mean elevation and range (m.a.s.l) | Survey dates        | No. trap days |
| Crocker Range    | 149.7                                | Sim.                  | 35 (3, 32)                     | 1029 (383-1452)                    | 6/10/11 - 27/2/12   | 4059          |
| Danum Valley (1) | 66.7                                 | Sim.                  | 23 (2, 21)                     | 285 (175-554)                      | 25/10/07 - 30/12/08 | 3857          |
| Danum Valley (2) | 157.0                                | Split                 | 79 (0, 79)                     | 384 (153-804)                      | 24/3/12 - 6/10/12   | 5837          |
| Kabili Sepilok   | 49.4                                 | Sim.                  | 35 (0, 35)                     | 66 (8-134)                         | 9/2/11 - 25/5/11    | 2054          |
| Kinabatangan     | 359.5                                | Split                 | 68 (0, 68)                     | 35 (5-135)                         | 24/7/10 - 17/12/10  | 4340          |
| Malua            | 102.8                                | Sim.                  | 38 (38, 0)                     | 177 (68-286)                       | 9/7/08 - 12/2/09    | 3869          |
| Tabin            | 71.4                                 | Split                 | 37 (1, 36)                     | 140 (11-407)                       | 16/12/09 - 22/4/10  | 6462          |
| Tawau (1)        | 149.0                                | Sim.                  | 77 (0, 77)                     | 706 (209-1195)                     | 21/10/12 - 30/12/13 | 17397         |
| Tawau (2)        | 135.7                                | Sim.                  | 71 (0, 71)                     | 671 (183-1102)                     | 6/7/13 - 11/12/14   | 17596         |
| Ulu Segama       | 60.1                                 | Sim.                  | 22 (19, 3)                     | 252 (150-408)                      | 24/5/07 - 18/10/07  | 2847          |
| Danum Palm       | 7.8                                  | Sim.                  | 23                             | 210 (120-295)                      | 15/3/09 - 7/7/09    | 2212          |
| Minat Teguh      | 44.0                                 | Sim.                  | 33                             | 23 (1-49)                          | 26/5/11 - 18/8/11   | 1960          |
| Totals:          | 1353.0                               | -                     | 578                            | -                                  | -                   | 72490         |
