# Supplementary material for: Spatio-temporal ecology of sympatric felids on Borneo. Evidence for resource partitioning?
Source: PubMed Central journal article supplement (PMC6054408; doi:10.1371/journal.pone.0200828), 2018-07-20
Supplement: pone.0200828.s006.pdf [file pone.0200828.s006.pdf]

# Spatio-temporal ecology of sympatric felids on Borneo. Evidence for resource partitioning?

Andrew J. Hearn, Samuel A. Cushman, Joanna Ross, Benoit Goossens, Luke T.B. Hunter, and David W. Macdonald

**S3 Table.** Covariates used in the multi-scale habitat modelling of Bornean felid's occurrence in Sabah, including variable names, metrics calculated, and data sources.

<sup>1</sup> Focal mean and standard deviation (SD) were calculated for all continuous variables.

| Variable name                                                | Metric <sup>1</sup> | Data source and description                                                                                                                                                                                                                          |
|--------------------------------------------------------------|---------------------|------------------------------------------------------------------------------------------------------------------------------------------------------------------------------------------------------------------------------------------------------|
| Elevation                                                    | Focal mean & SD     | Jarvis et al. 2008 ( <a href="http://srtm.csi.cgiar.org">http://srtm.csi.cgiar.org</a> ). A 30m resolution Shuttle Radar Topographic Mission (SRTM) digital elevation model                                                                          |
| Roughness                                                    | Focal mean & SD     | A digital elevation layer (Jarvis et al. 2008) was transformed into roughness using the Geomorphometry & Gradient Metrics Toolbox (Evans et al. 2014) in ArcGIS 10.2.2 (Environmental Systems Research Incorporated, ESRI, Redlands, CA, USA, 2011). |
| Canopy cover                                                 | Focal mean & SD     | Hansen et al. 2013 ( <a href="http://earthenginepartners.appspot.com/science-2013-global-forest/download_v1.2.html">http://earthenginepartners.appspot.com/science-2013-global-forest/download_v1.2.html</a> ). Provides % forest cover data.        |
| Human footprint                                              | Focal mean & SD     | Wildlife Conservation (WCS) and Center for International Earth Science Information Network (CIESIN) ( <a href="http://sedac.ciesin.columbia.edu/wildareas/">http://sedac.ciesin.columbia.edu/wildareas/</a> )                                        |
| Gaveau: Agroforest/forest regrowth                           | Focal mean          | 50m spatial resolution layers depicting Borneo-wide landcover with forest quality for the year 2010. Gaveau et al., (2014).                                                                                                                          |
| Gaveau: Logged forests                                       | Focal mean          |                                                                                                                                                                                                                                                      |
| Gaveau: Non forest                                           | Focal mean          |                                                                                                                                                                                                                                                      |
| Gaveau: Oil palm plantations                                 | Focal mean          |                                                                                                                                                                                                                                                      |
| Miettinen: Largescale palm production                        | Focal mean          |                                                                                                                                                                                                                                                      |
| Miettinen: Lowland forest                                    | Focal mean          | A 250m spatial resolution 2010 land cover map developed by Miettinen et al. (2012)                                                                                                                                                                   |
| Miettinen: Lowland mosaic                                    | Focal mean          |                                                                                                                                                                                                                                                      |
| Miettinen: Lowland open                                      | Focal mean          |                                                                                                                                                                                                                                                      |
| Miettinen: Peatswamp forest                                  | Focal mean          |                                                                                                                                                                                                                                                      |
| Miettinen: Plantation/regrowth                               | Focal mean          |                                                                                                                                                                                                                                                      |
| SFD: Lowland Freshwater Swamp Forest                         | Focal mean          | Unpublished historic forest layers developed by the Sabah Forestry Department, based on soil/elevation characteristics. This layer was clipped to areas defined as forest in the Gaveau et al., 2010 dataset, to account for deforestation.          |
| SFD: Lowland Mixed Dipterocarp & Kerangas Forest             | Focal mean          |                                                                                                                                                                                                                                                      |
| SFD: Lowland Mixed Dipterocarp Forest                        | Focal mean          |                                                                                                                                                                                                                                                      |
| SFD: Lowland Mixed Dipterocarp Forest & Limestone vegetation | Focal mean          |                                                                                                                                                                                                                                                      |
| SFD: Lowland Peat Swamp Forest                               | Focal mean          |                                                                                                                                                                                                                                                      |
| SFD: Lowland Seasonal Freshwater Swamp Forest                | Focal mean          |                                                                                                                                                                                                                                                      |
| SFD: Lowland Seasonal Freshwater Swamp Forest                | Focal mean          |                                                                                                                                                                                                                                                      |
