# Supplementary material for: Spatio-temporal ecology of sympatric felids on Borneo. Evidence for resource partitioning?
Source: PubMed Central journal article supplement (PMC6054408; doi:10.1371/journal.pone.0200828), 2018-07-20
Supplement: pone.0200828.s007.pdf [file pone.0200828.s007.pdf]

# Spatio-temporal ecology of sympatric felids on Borneo. Evidence for resource partitioning?

Andrew J. Hearn, Samuel A. Cushman, Joanna Ross, Benoit Goossens, Luke T.B. Hunter, and David W. Macdonald

**S4 Table.** Table of variables used in the felid/candidate prey co-occurrence all-subsets modelling and the felid/candidate prey temporal activity overlap analysis, showing variable description, number of independent photographic records for each species/group of species (<sup>a</sup> 1 record/ species/ camera station/ hour) and IUCN Red List status (CR: Critically endangered; EN: Endangered; VU; Vulnerable; NT: Near threatened; LC Least concern; NA: not applicable; Red List status as of July, 2016).

| Variable name          | Species records included in variable                                                                                                                                                                                                                                                                                                                          | No. records <sup>a</sup> | IUCN Red List <sup>b</sup> |
|------------------------|---------------------------------------------------------------------------------------------------------------------------------------------------------------------------------------------------------------------------------------------------------------------------------------------------------------------------------------------------------------|--------------------------|----------------------------|
| All mousedeer          | Combination of Greater mousedeer ( <i>Tragulus napu</i> ), Lesser mousedeer ( <i>T. kanchil</i> ) records, and Mousedeer records which are unidentifiable to the species level.                                                                                                                                                                               | 7314                     | NA                         |
| All muntjac            | Combination of Bornean Yellow Muntjac ( <i>Muntiacus atherodes</i> ), Southern Red Muntjac ( <i>M. muntjak</i> ) records, and muntjac records which are unidentifiable to the species level.                                                                                                                                                                  | 13447                    | NA                         |
| All partridges         | Combination of Blue-breasted quail ( <i>Synoicus chinensis</i> ), Sabah Partridge ( <i>Arborophila graydoni</i> ), Crested partridge ( <i>Rollulus rouloul</i> ), Crimson-headed partridge ( <i>Haematortyx sanguiniceps</i> ), Red-breasted partridge ( <i>Arborophila hyperythra</i> ) and partridge records which are unidentifiable to the species level. | 229                      | NA                         |
| All pheasants          | Combination of Bulwer's Pheasant ( <i>Lophura bulweri</i> ), Crested fireback ( <i>L. ignita</i> ), Great Argus ( <i>Argusianus argus</i> ) records, and pheasant records which are unidentifiable to the species level.                                                                                                                                      | 4892                     | NA                         |
| All pittas             | Combination of Bornean banded pitta ( <i>Pitta schwaneri</i> ), Black-headed pitta ( <i>P. ussheri</i> ), Blue-banded pitta ( <i>P. arcuata</i> ), Blue-headed pitta ( <i>P. baudii</i> ), Giant pitta ( <i>P. caerulea</i> ) and Hooded pitta ( <i>P. sordida</i> ) records, and pitta records which are unidentifiable to the species level.                | 342                      | NA                         |
| All small birds        | Combination of all bird records, excluding pheasants, pittas and partridges.                                                                                                                                                                                                                                                                                  | 512                      | NA                         |
| Banded linsang         | Banded Linsang ( <i>Prionodon linsang</i> )                                                                                                                                                                                                                                                                                                                   | 105                      | LC                         |
| Banded palm civet      | Banded palm civet ( <i>Hemigalus derbyanus</i> )                                                                                                                                                                                                                                                                                                              | 2237                     | NT                         |
| Banded pitta           | Bornean banded pitta ( <i>Pitta schwaneri</i> )                                                                                                                                                                                                                                                                                                               | 266                      | LC                         |
| Bay cat                | Borneo bay cat ( <i>Catopuma badia</i> )                                                                                                                                                                                                                                                                                                                      | 61                       | EN                         |
| Binturong              | Binturong ( <i>Arctictis binturong</i> )                                                                                                                                                                                                                                                                                                                      | 70                       | VU                         |
| Blue headed pitta      | Blue-headed Pitta ( <i>Pitta baudii</i> )                                                                                                                                                                                                                                                                                                                     | 37                       | VU                         |
| Bornean yellow muntjac | Bornean Yellow Muntjac ( <i>Muntiacus atherodes</i> )                                                                                                                                                                                                                                                                                                         | 7119                     | VU                         |
| Bulwers pheasant       | Bulwer's Pheasant ( <i>Lophura bulweri</i> )                                                                                                                                                                                                                                                                                                                  | 551                      | VU                         |

**S4 Table** (continued).

| Variable name          | Species records included in variable                                                                                                                                                                                                                                                           | No. records <sup>a</sup> | IUCN Red List <sup>b</sup> |
|------------------------|------------------------------------------------------------------------------------------------------------------------------------------------------------------------------------------------------------------------------------------------------------------------------------------------|--------------------------|----------------------------|
| Emerald dove           | Grey-capped emerald dove ( <i>Chalcophaps indica</i> )                                                                                                                                                                                                                                         | 363                      | LC                         |
| Great Argus pheasant   | Great Argus ( <i>Argusianus argus</i> )                                                                                                                                                                                                                                                        | 2976                     | NT                         |
| Greater coucal         | Greater Coucal ( <i>Centropus sinensis</i> )                                                                                                                                                                                                                                                   | 20                       | LC                         |
| Greater mousedeer      | Greater Mousedeer ( <i>Tragulus napu</i> )                                                                                                                                                                                                                                                     | 1882                     | LC                         |
| Hoses civet            | Hose's civet ( <i>Diplogale hosei</i> )                                                                                                                                                                                                                                                        | 281                      | VU                         |
| Leopard cat            | Leopard cat ( <i>Prionailurus bengalensis</i> )                                                                                                                                                                                                                                                | 1973                     | LC                         |
| Lesser mouse deer      | Lesser mousedeer ( <i>Tragulus kanchil</i> )                                                                                                                                                                                                                                                   | 2638                     | LC                         |
| Long-tailed macaque    | Long-tailed macaque ( <i>Macaca fascicularis</i> )                                                                                                                                                                                                                                             | 946                      | LC                         |
| Long-tailed porcupine  | Long-tailed Porcupine ( <i>Trichys fasciculata</i> )                                                                                                                                                                                                                                           | 865                      | LC                         |
| Malay badger           | Malay badger ( <i>Mydaus javanensis</i> )                                                                                                                                                                                                                                                      | 437                      | LC                         |
| Malay civet            | Malay civet ( <i>Viverra zangara</i> )                                                                                                                                                                                                                                                         | 6458                     | LC                         |
| Malay weasel           | Malay weasel ( <i>Mustela nudipes</i> )                                                                                                                                                                                                                                                        | 29                       | LC                         |
| Marbled cat            | Marbled cat ( <i>Pardofelis marmorata</i> )                                                                                                                                                                                                                                                    | 205                      | NT                         |
| Masked palmcivet       | Masked palm civet ( <i>Paguma larvata</i> )                                                                                                                                                                                                                                                    | 284                      | LC                         |
| Mongoose spp           | Combination of the records of Collared mongoose ( <i>Herpestes semitorquatus</i> ) and Short-tailed mongoose ( <i>Herpestes brachyurus</i> ), and mongoose records which are unidentifiable to the species level.                                                                              | 272                      | NA                         |
| Moonrat                | Moonrat ( <i>Echinosorex gymnura</i> )                                                                                                                                                                                                                                                         | 863                      | LC                         |
| Orangutan              | Bornean orangutan ( <i>Pongo pygmaeus</i> )                                                                                                                                                                                                                                                    | 254                      | CR                         |
| Otter civet            | Otter civet ( <i>Cynogale bennettii</i> )                                                                                                                                                                                                                                                      | 43                       | EN                         |
| Pangolin               | Sunda Pangolin ( <i>Manis javanica</i> )                                                                                                                                                                                                                                                       | 143                      | CR                         |
| Pig                    | Bearded Pig ( <i>Sus barbatus</i> ) (all records)                                                                                                                                                                                                                                              | 9587                     | VU                         |
| Pig adult              | Bearded Pig ( <i>Sus barbatus</i> ) (adult records only)                                                                                                                                                                                                                                       | 5977                     | VU                         |
| Pig juv                | Bearded Pig ( <i>Sus barbatus</i> ) (juvenile records only)                                                                                                                                                                                                                                    | 1231                     | VU                         |
| Pig subadult           | Bearded Pig ( <i>Sus barbatus</i> ) (subadult records only)                                                                                                                                                                                                                                    | 950                      | VU                         |
| Pig-tailed macaque     | Southern pig-tailed macaque ( <i>Macaca nemestrina</i> )                                                                                                                                                                                                                                       | 5219                     | VU                         |
| Rat spp                | Combination of the records of species within the family Muridae (up to 27 species in 10 genera).                                                                                                                                                                                               | 2319                     | NA                         |
| Red muntjac            | Southern Red Muntjac ( <i>Muntiacus muntjak</i> )                                                                                                                                                                                                                                              | 5906                     | LC                         |
| Sambar deer            | Sambar Deer ( <i>Rusa unicolor</i> )                                                                                                                                                                                                                                                           | 2751                     | VU                         |
| Short-tailed mongoose  | Short-tailed mongoose ( <i>Herpestes brachyurus</i> )                                                                                                                                                                                                                                          | 817                      | NT                         |
| Sun bear               | Malayan Sun Bear ( <i>Helarctos malayanus</i> )                                                                                                                                                                                                                                                | 914                      | VU                         |
| Thick-spined porcupine | Thick-spined porcupine ( <i>Hystrix crassispinis</i> )                                                                                                                                                                                                                                         | 614                      | LC                         |
| Treeshrew spp.         | Combination of the records of species within the family Tupaiidae (approx. 6 species).                                                                                                                                                                                                         | 587                      | NA                         |
| Tree squirrel          | Combination of the records of several, largely arboreal squirrel species, including: Horse-tailed squirrel ( <i>Sundasciurus hippurus</i> ), Low's Squirrel ( <i>S. lowii</i> ), Prevost's squirrel ( <i>Callosciurus prevostii</i> ), and Thomas's flying squirrel ( <i>Aeromys thomasi</i> ) | 364                      | NA                         |
| Tufted ground squirrel | Tufted ground squirrel ( <i>Rheithrosciurus macrotis</i> )                                                                                                                                                                                                                                     | 327                      | VU                         |
| Yellow-throated marten | Yellow-throated marten ( <i>Martes flavigula</i> )                                                                                                                                                                                                                                             | 312                      | LC                         |
