# Supplementary material for: Spatio-temporal ecology of sympatric felids on Borneo. Evidence for resource partitioning?
Source: PubMed Central journal article supplement (PMC6054408; doi:10.1371/journal.pone.0200828), 2018-07-20
Supplement: pone.0200828.s008.pdf [file pone.0200828.s008.pdf]

# Spatio-temporal ecology of sympatric felids on Borneo. Evidence for resource partitioning?

Andrew J. Hearn, Samuel A. Cushman, Joanna Ross, Benoit Goossens, Luke T.B. Hunter, and David W. Macdonald

**S5 Table.** Results of univariate logistic regressions to assess the relative importance of habitat variables in predicting Bornean felid occurrence, showing optimal scale of each habitat variable. Variables showing p values <0.2 were used in the multivariate analyses.

| Variable                                                     | Optimal scale (m) | Coefficient | AIC     | P-Value  |
|--------------------------------------------------------------|-------------------|-------------|---------|----------|
| <i>Sunda Clouded leopard</i>                                 |                   |             |         |          |
| Elevation                                                    | 120               | 0.00136     | 630.499 | 5.25E-05 |
| Gaveau: Agroforest/forest regrowth                           | 7680              | -2.03649    | 629.089 | 0.00012  |
| Gaveau: Oil palm plantations                                 | 7680              | -0.45241    | 617.683 | 7.52E-07 |
| Gaveau: Logged forests                                       | 7680              | 0.26937     | 613.737 | 1.07E-07 |
| Miettinen: Lowland open                                      | 7680              | -0.91899    | 637.082 | 0.00551  |
| Miettinen: Plantation/regrowth                               | 7680              | -0.98417    | 620.645 | 2.22E-06 |
| Miettinen: Lowland mosaic                                    | 7680              | -0.72579    | 627.689 | 0.00013  |
| SFD: Lowland Mixed Dipterocarp Forest                        | 480               | 0.30057     | 614.076 | 3.72E-05 |
| SFD: Lowland Mixed Dipterocarp Forest & Limestone vegetation | 120               | -0.59114    | 644.595 | 0.453    |
| Human footprint                                              | 7680              | -0.12614    | 610.372 | 1.26E-07 |
| Roughness                                                    | 7680              | 0.33954     | 627.513 | 2.41E-05 |
| Canopy cover                                                 | 7680              | 0.06582     | 613.916 | 2.98E-07 |
| Canopy cover std                                             | 7680              | -0.07639    | 606.944 | 2.24E-09 |
| <i>Bay cat</i>                                               |                   |             |         |          |
| Elevation                                                    | 120               | -73.83250   | 232.862 | 0.505    |
| Gaveau: Agroforest/forest regrowth                           | 480               | -21.42180   | 227.439 | 0.271    |
| Gaveau: Oil palm plantations                                 | 1920              | -81.36520   | 222.353 | 0.6      |
| Gaveau: Logged forests                                       | 240               | 190.14540   | 223.22  | 0.99     |
| Miettinen: Lowland open                                      | 1920              | -8233.51000 | 230.473 | 0.961    |
| Miettinen: Plantation/regrowth                               | 240               | -1.20425    | 235.291 | 0.332    |
| Miettinen: Lowland mosaic                                    | 1920              | -139.75500  | 226.003 | 0.612    |
| SFD: Lowland Mixed Dipterocarp Forest                        | 1920              | 46.37472    | 221.218 | 0.567    |
| SFD: Lowland Mixed Dipterocarp Forest & Limestone vegetation | 7680              | -3728.43000 | 237.053 | 0.989    |
| Human footprint                                              | 3840              | -0.07375    | 237.425 | 0.1197   |
| Roughness                                                    | 7680              | 0.25091     | 238.084 | 0.159    |
| Canopy cover                                                 | 3840              | 0.16767     | 227.957 | 0.02108  |
| Canopy cover std                                             | 960               | -0.58446    | 222.66  | 0.0859   |
| <i>Marbled cat</i>                                           |                   |             |         |          |
| Elevation                                                    | 120               | 0.00129     | 475.054 | 0.00085  |
| Gaveau: Agroforest/forest regrowth                           | 7680              | -2.47138    | 471.408 | 0.00073  |
| Gaveau: Oil palm plantations                                 | 7680              | -0.48467    | 466.581 | 9.87E-05 |
| Gaveau: Logged forests                                       | 7680              | 0.29443     | 463.074 | 2.03E-05 |
| Miettinen: Lowland open                                      | 7680              | -1.62160    | 474.008 | 0.00839  |
| Miettinen: Plantation/regrowth                               | 3840              | -0.59497    | 476.393 | 0.00679  |
| Miettinen: Lowland mosaic                                    | 7680              | -0.90594    | 471.089 | 0.00176  |

**S5 Table Continued.**

| Variable                                                        | Optimal scale<br>(m) | Coefficient | AIC     | P-Value  |
|-----------------------------------------------------------------|----------------------|-------------|---------|----------|
| <i>Leopard cat</i>                                              |                      |             |         |          |
| Elevation                                                       | 1920                 | -0.00117    | 757.009 | 0.00144  |
| Gaveau: Agroforest/forest regrowth                              | 7680                 | 0.61839     | 764.908 | 0.08163  |
| Gaveau: Oil palm plantations                                    | 480                  | 0.53711     | 699.623 | 8.75E-12 |
| Gaveau: Logged forests                                          | 480                  | -0.20891    | 725.567 | 3.52E-10 |
| Miettinen: Lowland open                                         | 7680                 | -0.81129    | 755.524 | 0.00097  |
| Miettinen: Plantation/regrowth                                  | 7680                 | -0.67206    | 750.488 | 5.86E-05 |
| Miettinen: Lowland mosaic                                       | 3840                 | -0.61699    | 749.64  | 0.00013  |
| SFD: Lowland Mixed Dipterocarp Forest                           | 240                  | -0.14167    | 741.72  | 4.62E-07 |
| SFD: Lowland Mixed Dipterocarp Forest & Limestone<br>vegetation | 7680                 | -6.32376    | 757.811 | 0.0386   |
| Human footprint                                                 | 960                  | 0.01841     | 766.399 | 0.21537  |
| Roughness                                                       | 3840                 | -0.11632    | 764.172 | 0.0537   |
| Canopy cover                                                    | 120                  | -0.03296    | 745.432 | 9.72E-06 |
| Canopy cover std                                                | 240                  | 0.17063     | 751.814 | 9.58E-05 |
