# Supplementary material for: Spatio-temporal ecology of sympatric felids on Borneo. Evidence for resource partitioning?
Source: PubMed Central journal article supplement (PMC6054408; doi:10.1371/journal.pone.0200828), 2018-07-20
Supplement: pone.0200828.s009.pdf [file pone.0200828.s009.pdf]

## Spatio-temporal ecology of sympatric felids on Borneo. Evidence for resource partitioning?

**S6 Table.** Table of Overlaps of temporal activity patterns between Bornean wild cat species pairs and between Bornean wild cats and their potential prey species, as estimated by kernel density estimates. The coefficients of overlap ( $\Delta_1$  and  $\Delta_4$ ) are accompanied by the upper and lower values of the 95 % confidence limits.

|                              | Clouded leopard |       |       | Clouded leopard Males |       |       | Clouded leopard Females |       |       | Bay cat    |       |       | Marbled cat |       |       | Leopard cat |       |       |
|------------------------------|-----------------|-------|-------|-----------------------|-------|-------|-------------------------|-------|-------|------------|-------|-------|-------------|-------|-------|-------------|-------|-------|
|                              | $\Delta_4$      | lower | upper | $\Delta_4$            | lower | upper | $\Delta_4$              | lower | upper | $\Delta_1$ | lower | upper | $\Delta_4$  | lower | upper | $\Delta_4$  | lower | upper |
| Felids:                      |                 |       |       |                       |       |       |                         |       |       |            |       |       |             |       |       |             |       |       |
| Clouded leopard              | -               | -     | -     | -                     | -     | -     | -                       | -     | -     | 0.398      | 0.331 | 0.468 | 0.521       | 0.463 | 0.576 | 0.742       | 0.707 | 0.777 |
| Clouded leopard male         | -               | -     | -     | -                     | -     | -     | 0.873                   | 0.789 | 0.946 | 0.396      | 0.327 | 0.468 | 0.520       | 0.459 | 0.579 | 0.739       | 0.701 | 0.779 |
| Clouded leopard female       | -               | -     | -     | 0.873                 | 0.789 | 0.946 |                         |       |       | 0.411      | 0.307 | 0.519 | 0.525       | 0.413 | 0.626 | 0.734       | 0.646 | 0.825 |
| Bay cat                      | 0.398           | 0.331 | 0.468 | 0.396                 | 0.327 | 0.468 | 0.411                   | 0.307 | 0.519 |            |       |       | 0.787       | 0.695 | 0.871 | 0.147       | 0.091 | 0.209 |
| Marbled cat                  | 0.521           | 0.463 | 0.576 | 0.520                 | 0.459 | 0.579 | 0.525                   | 0.413 | 0.626 | 0.787      | 0.695 | 0.871 |             |       |       | 0.264       | 0.206 | 0.305 |
| Leopard cat                  | 0.742           | 0.707 | 0.777 | 0.739                 | 0.701 | 0.779 | 0.734                   | 0.646 | 0.825 | 0.147      | 0.091 | 0.209 | 0.264       | 0.206 | 0.305 | -           | -     | -     |
| Potential prey:              |                 |       |       |                       |       |       |                         |       |       |            |       |       |             |       |       |             |       |       |
| All mousedeer                | 0.803           | 0.774 | 0.832 | 0.824                 | 0.786 | 0.847 | 0.759                   | 0.686 | 0.830 | 0.428      | 0.356 | 0.504 | 0.609       | 0.551 | 0.664 | 0.581       | 0.561 | 0.600 |
| All muntjac                  | 0.518           | 0.483 | 0.553 | 0.529                 | 0.492 | 0.564 | 0.531                   | 0.435 | 0.618 | 0.802      | 0.733 | 0.870 | 0.914       | 0.878 | 0.945 | 0.261       | 0.248 | 0.274 |
| All partridges               | 0.378           | 0.338 | 0.420 | 0.379                 | 0.336 | 0.421 | 0.383                   | 0.280 | 0.484 | 0.761      | 0.669 | 0.859 | 0.769       | 0.702 | 0.838 | 0.109       | 0.082 | 0.136 |
| All pheasants                | 0.372           | 0.339 | 0.405 | 0.373                 | 0.336 | 0.408 | 0.380                   | 0.280 | 0.473 | 0.861      | 0.790 | 0.933 | 0.843       | 0.792 | 0.889 | 0.104       | 0.090 | 0.117 |
| All pittas                   | 0.390           | 0.348 | 0.430 | 0.391                 | 0.349 | 0.431 | 0.392                   | 0.294 | 0.490 | 0.853      | 0.766 | 0.930 | 0.821       | 0.763 | 0.877 | 0.120       | 0.097 | 0.145 |
| All small birds              | 0.395           | 0.356 | 0.433 | 0.396                 | 0.357 | 0.434 | 0.399                   | 0.295 | 0.501 | 0.898      | 0.812 | 0.968 | 0.848       | 0.788 | 0.902 | 0.123       | 0.102 | 0.144 |
| Banded linsang               | 0.704           | 0.640 | 0.768 | 0.700                 | 0.638 | 0.765 | 0.706                   | 0.595 | 0.807 | 0.118      | 0.048 | 0.196 | 0.209       | 0.139 | 0.280 | 0.913       | 0.852 | 0.962 |
| Banded palm civet            | 0.629           | 0.593 | 0.664 | 0.624                 | 0.527 | 0.727 | 0.653                   | 0.556 | 0.755 | 0.082      | 0.034 | 0.141 | 0.171       | 0.125 | 0.218 | 0.859       | 0.836 | 0.881 |
| Banded pitta                 | 0.367           | 0.324 | 0.410 | 0.367                 | 0.325 | 0.412 | 0.372                   | 0.274 | 0.475 | 0.853      | 0.767 | 0.932 | 0.796       | 0.737 | 0.853 | 0.100       | 0.075 | 0.125 |
| Binturong                    | 0.716           | 0.612 | 0.815 | 0.703                 | 0.596 | 0.806 | 0.719                   | 0.581 | 0.839 | 0.625      | 0.506 | 0.731 | 0.674       | 0.580 | 0.762 | 0.498       | 0.388 | 0.604 |
| Blue-headed pitta            | 0.411           | 0.334 | 0.494 | 0.412                 | 0.332 | 0.489 | 0.405                   | 0.293 | 0.526 | 0.880      | 0.738 | 0.970 | 0.809       | 0.702 | 0.906 | 0.151       | 0.086 | 0.221 |
| Bornean yellow muntjac       | 0.462           | 0.411 | 0.478 | 0.445                 | 0.408 | 0.480 | 0.447                   | 0.350 | 0.543 | 0.443      | 0.351 | 0.537 | 0.899       | 0.856 | 0.934 | 0.175       | 0.161 | 0.189 |
| Bulwers pheasant             | 0.393           | 0.356 | 0.431 | 0.394                 | 0.354 | 0.432 | 0.399                   | 0.298 | 0.497 | 0.791      | 0.711 | 0.876 | 0.835       | 0.774 | 0.888 | 0.124       | 0.104 | 0.144 |
| Chestnut necklaced partridge | 0.409           | 0.339 | 0.484 | 0.410                 | 0.330 | 0.489 | 0.410                   | 0.293 | 0.524 | 0.792      | 0.653 | 0.914 | 0.782       | 0.659 | 0.894 | 0.135       | 0.074 | 0.200 |
| Collared mongoose            | 0.371           | 0.323 | 0.420 | 0.372                 | 0.323 | 0.425 | 0.368                   | 0.261 | 0.468 | 0.833      | 0.719 | 0.927 | 0.762       | 0.688 | 0.831 | 0.112       | 0.080 | 0.148 |
| Common palm civet            | 0.691           | 0.651 | 0.731 | 0.688                 | 0.643 | 0.730 | 0.700                   | 0.600 | 0.793 | 0.091      | 0.051 | 0.175 | 0.211       | 0.159 | 0.263 | 0.932       | 0.901 | 0.959 |
| Common porcupine             | 0.632           | 0.593 | 0.670 | 0.627                 | 0.589 | 0.665 | 0.659                   | 0.560 | 0.761 | 0.071      | 0.033 | 0.145 | 0.177       | 0.133 | 0.226 | 0.852       | 0.828 | 0.876 |
| Crested fireback             | 0.397           | 0.364 | 0.433 | 0.399                 | 0.362 | 0.436 | 0.400                   | 0.300 | 0.502 | 0.800      | 0.726 | 0.879 | 0.864       | 0.816 | 0.908 | 0.127       | 0.111 | 0.144 |
| Crested partridge            | 0.380           | 0.336 | 0.425 | 0.381                 | 0.334 | 0.431 | 0.384                   | 0.286 | 0.485 | 0.761      | 0.662 | 0.860 | 0.763       | 0.682 | 0.841 | 0.111       | 0.080 | 0.143 |
| Elephant                     | 0.657           | 0.606 | 0.709 | 0.644                 | 0.590 | 0.692 | 0.704                   | 0.612 | 0.795 | 0.610      | 0.521 | 0.698 | 0.725       | 0.662 | 0.789 | 0.479       | 0.439 | 0.521 |

**S6 Table.** (Continued).

|                        | Clouded leopard |       |       | Clouded leopard Males |       |       | Clouded leopard Females |       |       | Bay cat |       |       | Marbled cat |       |       | Leopard cat |       |       |
|------------------------|-----------------|-------|-------|-----------------------|-------|-------|-------------------------|-------|-------|---------|-------|-------|-------------|-------|-------|-------------|-------|-------|
|                        | Dhat4           | lower | upper | Dhat4                 | lower | upper | Dhat4                   | lower | upper | Dhat1   | lower | upper | Dhat4       | lower | upper | Dhat4       | lower | upper |
| Potential prey:        |                 |       |       |                       |       |       |                         |       |       |         |       |       |             |       |       |             |       |       |
| Greater coucal         | 0.306           | 0.212 | 0.413 | 0.303                 | 0.203 | 0.407 | 0.327                   | 0.209 | 0.453 | 0.839   | 0.660 | 0.963 | 0.685       | 0.535 | 0.818 | 0.065       | 0.003 | 0.155 |
| Greater mousedeer      | 0.869           | 0.832 | 0.902 | 0.860                 | 0.819 | 0.897 | 0.854                   | 0.777 | 0.920 | 0.305   | 0.243 | 0.376 | 0.457       | 0.400 | 0.509 | 0.795       | 0.770 | 0.820 |
| Hoses civet            | 0.723           | 0.675 | 0.768 | 0.719                 | 0.662 | 0.769 | 0.728                   | 0.628 | 0.824 | 0.138   | 0.078 | 0.204 | 0.233       | 0.179 | 0.292 | 0.930       | 0.891 | 0.964 |
| Lesser mousedeer       | 0.670           | 0.635 | 0.707 | 0.672                 | 0.634 | 0.711 | 0.645                   | 0.562 | 0.727 | 0.519   | 0.438 | 0.600 | 0.704       | 0.648 | 0.754 | 0.423       | 0.399 | 0.445 |
| Long-tailed macaque    | 0.353           | 0.317 | 0.387 | 0.351                 | 0.313 | 0.389 | 0.365                   | 0.269 | 0.465 | 0.850   | 0.754 | 0.932 | 0.693       | 0.622 | 0.758 | 0.096       | 0.080 | 0.112 |
| Long-tailed porcupine  | 0.633           | 0.598 | 0.667 | 0.630                 | 0.591 | 0.672 | 0.645                   | 0.549 | 0.738 | 0.071   | 0.020 | 0.127 | 0.154       | 0.109 | 0.202 | 0.867       | 0.837 | 0.894 |
| Malay badger           | 0.670           | 0.630 | 0.711 | 0.668                 | 0.625 | 0.710 | 0.663                   | 0.568 | 0.753 | 0.084   | 0.032 | 0.144 | 0.168       | 0.118 | 0.224 | 0.897       | 0.862 | 0.927 |
| Malay civet            | 0.734           | 0.703 | 0.766 | 0.732                 | 0.699 | 0.767 | 0.731                   | 0.645 | 0.814 | 0.132   | 0.074 | 0.193 | 0.254       | 0.208 | 0.308 | 0.939       | 0.920 | 0.959 |
| Malay weasel           | 0.396           | 0.308 | 0.492 | 0.396                 | 0.305 | 0.491 | 0.405                   | 0.278 | 0.533 | 0.777   | 0.614 | 0.916 | 0.770       | 0.625 | 0.898 | 0.140       | 0.058 | 0.238 |
| Masked palm civet      | 0.785           | 0.739 | 0.830 | 0.781                 | 0.733 | 0.830 | 0.775                   | 0.686 | 0.858 | 0.195   | 0.125 | 0.274 | 0.331       | 0.272 | 0.394 | 0.893       | 0.846 | 0.934 |
| Mongoose spp           | 0.371           | 0.328 | 0.415 | 0.370                 | 0.326 | 0.419 | 0.374                   | 0.276 | 0.471 | 0.878   | 0.787 | 0.939 | 0.749       | 0.687 | 0.815 | 0.106       | 0.082 | 0.134 |
| Moonrat                | 0.675           | 0.639 | 0.712 | 0.672                 | 0.632 | 0.712 | 0.679                   | 0.585 | 0.772 | 0.092   | 0.037 | 0.150 | 0.187       | 0.139 | 0.240 | 0.926       | 0.900 | 0.951 |
| Orangutan              | 0.366           | 0.322 | 0.408 | 0.363                 | 0.318 | 0.409 | 0.381                   | 0.285 | 0.480 | 0.880   | 0.786 | 0.953 | 0.712       | 0.640 | 0.780 | 0.112       | 0.083 | 0.142 |
| Otter civet            | 0.648           | 0.563 | 0.738 | 0.644                 | 0.564 | 0.729 | 0.668                   | 0.564 | 0.776 | 0.097   | 0.020 | 0.178 | 0.173       | 0.095 | 0.262 | 0.885       | 0.787 | 0.956 |
| Pangolin               | 0.643           | 0.578 | 0.702 | 0.639                 | 0.572 | 0.706 | 0.616                   | 0.507 | 0.714 | 0.092   | 0.031 | 0.161 | 0.171       | 0.110 | 0.230 | 0.816       | 0.759 | 0.865 |
| Pig                    | 0.611           | 0.577 | 0.644 | 0.611                 | 0.573 | 0.644 | 0.612                   | 0.513 | 0.712 | 0.763   | 0.685 | 0.832 | 0.885       | 0.839 | 0.928 | 0.349       | 0.333 | 0.366 |
| Pig adult              | 0.595           | 0.562 | 0.629 | 0.594                 | 0.558 | 0.630 | 0.598                   | 0.509 | 0.692 | 0.787   | 0.718 | 0.861 | 0.883       | 0.830 | 0.928 | 0.334       | 0.318 | 0.352 |
| Pig juv                | 0.450           | 0.415 | 0.485 | 0.448                 | 0.409 | 0.490 | 0.460                   | 0.362 | 0.570 | 0.895   | 0.819 | 0.949 | 0.818       | 0.754 | 0.876 | 0.186       | 0.165 | 0.208 |
| Pig subadult           | 0.477           | 0.438 | 0.515 | 0.474                 | 0.435 | 0.514 | 0.492                   | 0.391 | 0.586 | 0.863   | 0.789 | 0.921 | 0.861       | 0.804 | 0.914 | 0.220       | 0.195 | 0.244 |
| Pig-tailed macaque     | 0.332           | 0.298 | 0.364 | 0.331                 | 0.296 | 0.365 | 0.343                   | 0.258 | 0.438 | 0.899   | 0.832 | 0.959 | 0.712       | 0.659 | 0.771 | 0.085       | 0.073 | 0.097 |
| Rat spp                | 0.635           | 0.602 | 0.670 | 0.632                 | 0.595 | 0.667 | 0.649                   | 0.548 | 0.748 | 0.083   | 0.037 | 0.135 | 0.162       | 0.119 | 0.207 | 0.874       | 0.853 | 0.895 |
| Red muntjac            | 0.621           | 0.586 | 0.658 | 0.622                 | 0.585 | 0.659 | 0.624                   | 0.527 | 0.718 | 0.747   | 0.679 | 0.806 | 0.866       | 0.821 | 0.905 | 0.356       | 0.338 | 0.373 |
| Sambar deer            | 0.905           | 0.874 | 0.937 | 0.892                 | 0.856 | 0.926 | 0.853                   | 0.770 | 0.922 | 0.419   | 0.359 | 0.493 | 0.570       | 0.525 | 0.618 | 0.700       | 0.677 | 0.721 |
| Short-tailed mongoose  | 0.358           | 0.320 | 0.395 | 0.357                 | 0.322 | 0.394 | 0.366                   | 0.273 | 0.461 | 0.917   | 0.836 | 0.976 | 0.751       | 0.691 | 0.812 | 0.099       | 0.081 | 0.116 |
| Sun bear               | 0.723           | 0.679 | 0.765 | 0.711                 | 0.665 | 0.755 | 0.726                   | 0.629 | 0.814 | 0.601   | 0.521 | 0.682 | 0.766       | 0.705 | 0.823 | 0.497       | 0.466 | 0.529 |
| Thick-spinedporcupine  | 0.680           | 0.640 | 0.720 | 0.677                 | 0.636 | 0.720 | 0.681                   | 0.584 | 0.769 | 0.096   | 0.039 | 0.150 | 0.189       | 0.141 | 0.241 | 0.923       | 0.891 | 0.951 |
| Tree shrew spp.        | 0.422           | 0.385 | 0.460 | 0.423                 | 0.386 | 0.462 | 0.423                   | 0.326 | 0.526 | 0.747   | 0.663 | 0.835 | 0.815       | 0.756 | 0.873 | 0.156       | 0.135 | 0.179 |
| Tree squirrel          | 0.425           | 0.383 | 0.466 | 0.427                 | 0.385 | 0.469 | 0.428                   | 0.330 | 0.528 | 0.750   | 0.659 | 0.838 | 0.837       | 0.773 | 0.895 | 0.159       | 0.133 | 0.187 |
| Tufted ground squirrel | 0.315           | 0.274 | 0.356 | 0.314                 | 0.272 | 0.357 | 0.323                   | 0.234 | 0.421 | 0.782   | 0.688 | 0.872 | 0.629       | 0.555 | 0.699 | 0.078       | 0.056 | 0.102 |
| Yellow throated marten | 0.402           | 0.356 | 0.447 | 0.410                 | 0.364 | 0.458 | 0.433                   | 0.333 | 0.537 | 0.852   | 0.743 | 0.939 | 0.810       | 0.738 | 0.876 | 0.159       | 0.128 | 0.191 |
